# Supplementary material for: Emerging sporotrichosis is driven by clonal and recombinant Sporothrix species
Source: PubMed Central journal article supplement (PMC4051365; doi:10.1038/emi.2014.33), 2014-05-07
Supplement: emi201433x1.pdf [file emi201433x1.pdf]

**Supplementary Table S1:** Strains, species, origin, mtDNA, haplotypes and GenBank accession numbers of *Sporothrix* spp. isolates used in this study.

| Isolate code | CBS code   | Species                | Source                | Origin                    | mtDNA type <sup>a</sup> | Hap <sup>b</sup> | GenBank accession number |                    |                  | Reference <sup>f</sup> |
|--------------|------------|------------------------|-----------------------|---------------------------|-------------------------|------------------|--------------------------|--------------------|------------------|------------------------|
|              |            |                        |                       |                           |                         |                  | CAL <sup>c</sup>         | mtDNA <sup>d</sup> | ITS <sup>e</sup> |                        |
| Ss01         | CBS 132961 | <i>S. schenckii</i>    | Feline sporotrichosis | S ão Paulo, Brazil        | 557bp                   | H53              | KC693828                 | KJ020361           | -                | (1)                    |
| Ss02         | CBS 132962 | <i>S. schenckii</i>    | Human sporotrichosis  | Rio Grande do Sul, Brazil | 1157bp                  | H31              | KC693829                 | KJ020362           | -                | (1)                    |
| Ss03         | CBS 132963 | <i>S. schenckii</i>    | Human sporotrichosis  | Rio Grande do Sul, Brazil | 1157bp                  | H32              | JX077117                 | KJ020363           | KF574446         | (2)                    |
| Ss04         | -          | <i>S. schenckii</i>    | Human sporotrichosis  | Rio Grande do Sul, Brazil | 1157bp                  | H32              | JX077118                 | KJ020364           | KF961156         | (2)                    |
| Ss05         | CBS 132985 | <i>S. brasiliensis</i> | Feline sporotrichosis | Minas Gerais, Brazil      | 1157bp                  | H01              | KC693830                 | KJ020365           | KF961142         | (1)                    |
| Ss06         | CBS 132922 | <i>S. globosa</i>      | Human sporotrichosis  | Minas Gerais, Brazil      | 557bp                   | H86              | JF811336                 | KJ020366           | JN885574         | (2)                    |
| Ss07         | CBS 132986 | <i>S. brasiliensis</i> | Human sporotrichosis  | Minas Gerais, Brazil      | 1157bp                  | H01              | KC693831                 | KJ020367           | KF961143         | (1)                    |
| Ss08         | -          | <i>S. brasiliensis</i> | Human sporotrichosis  | Minas Gerais, Brazil      | 1157bp                  | H01              | KC693832                 | KJ020368           | -                | (1)                    |
| Ss09         | -          | <i>S. brasiliensis</i> | Human sporotrichosis  | Minas Gerais, Brazil      | 1157bp                  | H01              | KC693833                 | KJ020369           | -                | (1)                    |
| Ss10         | CBS 132987 | <i>S. brasiliensis</i> | Human sporotrichosis  | Minas Gerais, Brazil      | 1157bp                  | H01              | KC693834                 | KJ020370           | -                | (1)                    |
| Ss11         | -          | <i>S. brasiliensis</i> | Human sporotrichosis  | Minas Gerais, Brazil      | 1157bp                  | H01              | KF943631                 | KJ020371           | -                | This study             |
| Ss12         | -          | <i>S. brasiliensis</i> | Human sporotrichosis  | Minas Gerais, Brazil      | 1157bp                  | H01              | KC693835                 | KJ020372           | KF961144         | (1)                    |
| Ss13         | -          | <i>S. schenckii</i>    | Human sporotrichosis  | Minas Gerais, Brazil      | 557bp                   | H57              | KC693836                 | KJ020373           | KF961157         | (1)                    |
| Ss14         | -          | <i>S. brasiliensis</i> | Human sporotrichosis  | Minas Gerais, Brazil      | 1157bp                  | H02              | KF943632                 | KJ020374           | KF961145         | This study             |
| Ss15         | -          | <i>S. schenckii</i>    | Human sporotrichosis  | Minas Gerais, Brazil      | 557bp                   | H69              | KC693837                 | KJ020375           | KF961158         | (1)                    |
| Ss16         | -          | <i>S. schenckii</i>    | Human sporotrichosis  | Piau í Brazil             | 1157bp                  | H40              | JQ041898                 | KJ020376           | KF961159         | (3)                    |
| Ss17         | -          | <i>S. schenckii</i>    | Human sporotrichosis  | Paraná Brazil             | 557bp                   | H53              | KC693838                 | KJ020377           | KF961160         | (1)                    |
| Ss19         | -          | <i>S. schenckii</i>    | Human sporotrichosis  | Paraná Brazil             | 557bp                   | H58              | KF943633                 | KJ020378           | KF961161         | This study             |
| Ss20         | -          | <i>S. schenckii</i>    | Human sporotrichosis  | Paraná Brazil             | 557bp                   | H53              | JX077119                 | KJ020379           | -                | (2)                    |
| Ss21         | -          | <i>S. schenckii</i>    | Human sporotrichosis  | Paraná Brazil             | 557bp                   | H53              | JX077120                 | KJ020380           | -                | (2)                    |
| Ss22         | CBS 132964 | <i>S. schenckii</i>    | Human sporotrichosis  | Paraná Brazil             | 557bp                   | H73              | KF943634                 | KJ020381           | KF961162         | This study             |
| Ss24         | -          | <i>S. schenckii</i>    | Human sporotrichosis  | Paraná Brazil             | 557bp                   | H58              | KC693839                 | KJ020382           | -                | (1)                    |
| Ss25         | CBS 132988 | <i>S. brasiliensis</i> | Human sporotrichosis  | Paraná Brazil             | 1157bp                  | H03              | KC693840                 | KJ020383           | -                | (1)                    |
| Ss26         | CBS 132965 | <i>S. schenckii</i>    | Human sporotrichosis  | Paraná Brazil             | 557bp                   | H77              | KC693841                 | KJ020384           | -                | (1)                    |
| Ss27         | -          | <i>S. brasiliensis</i> | Human sporotrichosis  | Paraná Brazil             | 1157bp                  | H04              | JX077111                 | KJ020385           | -                | (2)                    |
| Ss28         | -          | <i>S. schenckii</i>    | Human sporotrichosis  | Paraná Brazil             | 557bp                   | H58              | JX077121                 | KJ020386           | -                | (2)                    |
| Ss30         | -          | <i>S. schenckii</i>    | Human sporotrichosis  | Paraná Brazil             | 557bp                   | H72              | KF943635                 | KJ020387           | -                | This study             |
| Ss31         | -          | <i>S. schenckii</i>    | Human sporotrichosis  | Paraná Brazil             | 557bp                   | H58              | JX077122                 | KJ020388           | -                | (2)                    |
| Ss32         | -          | <i>S. brasiliensis</i> | Human sporotrichosis  | Paraná Brazil             | 1157bp                  | H09              | KF943636                 | KJ020389           | -                | This study             |
| Ss33         | -          | <i>S. brasiliensis</i> | Human sporotrichosis  | Paraná Brazil             | 1157bp                  | H01              | KF943637                 | KJ020390           | KF961146         | This study             |

| Isolate code | CBS code   | Species                | Source                | Origin                    | mtDNA type <sup>a</sup> | Hap <sup>b</sup> | GenBank accession number |                    |                  | Reference <sup>f</sup> |
|--------------|------------|------------------------|-----------------------|---------------------------|-------------------------|------------------|--------------------------|--------------------|------------------|------------------------|
|              |            |                        |                       |                           |                         |                  | CAL <sup>c</sup>         | mtDNA <sup>d</sup> | ITS <sup>e</sup> |                        |
| Ss34         | -          | <i>S. brasiliensis</i> | Human sporotrichosis  | Paraná, Brazil            | 1157bp                  | H44              | KF943638                 | KJ020391           | KF961147         | This study             |
| Ss35         | -          | <i>S. schenckii</i>    | Human sporotrichosis  | Paraná, Brazil            | 557bp                   | H67              | KC693842                 | KJ020392           | -                | (1)                    |
| Ss36         | -          | <i>S. schenckii</i>    | Human sporotrichosis  | Paraná, Brazil            | 557bp                   | H78              | KC693843                 | KJ020393           | KF961163         | (1)                    |
| Ss37         | -          | <i>S. brasiliensis</i> | Human sporotrichosis  | Paraná, Brazil            | 1157bp                  | H05              | KF943639                 | KJ020394           | KF961148         | This study             |
| Ss38         | -          | <i>S. brasiliensis</i> | Human sporotrichosis  | Paraná, Brazil            | 1157bp                  | H01              | KC693844                 | KJ020395           | KF961149         | (1)                    |
| Ss39         | -          | <i>S. schenckii</i>    | Human sporotrichosis  | Paraná, Brazil            | 1157bp                  | H31              | JQ041899                 | KJ020396           | JN885576         | (3)                    |
| Ss40         | -          | <i>S. schenckii</i>    | Human sporotrichosis  | Ceará, Brazil             | 557bp                   | H79              | JQ041900                 | KJ020397           | JN885577         | (3)                    |
| Ss41         | CBS 132923 | <i>S. globosa</i>      | Human sporotrichosis  | Ceará, Brazil             | 557bp                   | H87              | JF811337                 | KJ020398           | KF574456         | (2)                    |
| Ss42         | CBS 132966 | <i>S. schenckii</i>    | Human sporotrichosis  | Ceará, Brazil             | 557bp                   | H79              | KF943640                 | KJ020399           | KF961164         | This study             |
| Ss43         | -          | <i>S. brasiliensis</i> | Human sporotrichosis  | Ceará, Brazil             | 1157bp                  | H03              | JX077112                 | KJ020400           | KF961150         | (2)                    |
| Ss44         | -          | <i>S. brasiliensis</i> | Human sporotrichosis  | Ceará, Brazil             | 1157bp                  | H01              | KF943641                 | KJ020401           | KF961151         | This study             |
| Ss45         | -          | <i>S. schenckii</i>    | Human sporotrichosis  | Goiás, Brazil             | -                       | -                | KJ020358                 | -                  | KF961165         | This study             |
| Ss46         | -          | <i>S. schenckii</i>    | Human sporotrichosis  | Goiás, Brazil             | 557bp                   | H80              | KF943642                 | KJ020402           | KF961166         | This study             |
| Ss47         | -          | <i>S. schenckii</i>    | Human sporotrichosis  | Goiás, Brazil             | 1157bp                  | H45              | JQ041901                 | KJ020403           | KF961118         | (3)                    |
| Ss48         | -          | <i>S. schenckii</i>    | Human sporotrichosis  | Goiás, Brazil             | 1157bp                  | H46              | KF943643                 | KJ020404           | KF961167         | This study             |
| Ss49         | CBS 132924 | <i>S. globosa</i>      | Human sporotrichosis  | Goiás, Brazil             | 557bp                   | H88              | JF811338                 | KJ020405           | KF961180         | (2)                    |
| Ss50         | -          | <i>S. schenckii</i>    | Human sporotrichosis  | Goiás, Brazil             | 1157bp                  | H47              | KF943644                 | KJ020406           | -                | This study             |
| Ss51         | -          | <i>S. schenckii</i>    | Human sporotrichosis  | Paraná, Brazil            | 1157bp                  | H48              | JQ041902                 | KJ020407           | JN885579         | (3)                    |
| Ss52         | -          | <i>S. brasiliensis</i> | Human sporotrichosis  | São Paulo, Brazil         | 1157bp                  | H06              | KC693845                 | KJ020408           | KF574444         | (1)                    |
| Ss53         | CBS 132989 | <i>S. brasiliensis</i> | Feline sporotrichosis | Rio Grande do Sul, Brazil | 1157bp                  | H01              | KC693846                 | KJ020409           | -                | (1)                    |
| Ss54         | CBS 132990 | <i>S. brasiliensis</i> | Feline sporotrichosis | Rio Grande do Sul, Brazil | 1157bp                  | H01              | JQ041903                 | KJ020410           | JN885580         | (2)                    |
| Ss55         | -          | <i>S. brasiliensis</i> | Human sporotrichosis  | Rio Grande do Sul, Brazil | 1157bp                  | H01              | KC693847                 | KJ020411           | KF961152         | (1)                    |
| Ss56         | -          | <i>S. brasiliensis</i> | Human sporotrichosis  | Rio Grande do Sul, Brazil | 1157bp                  | H01              | KC693848                 | KJ020412           | KF961153         | (1)                    |
| Ss57         | -          | <i>S. brasiliensis</i> | Human sporotrichosis  | Rio Grande do Sul, Brazil | 1157bp                  | H01              | KF943645                 | KJ020413           | KF961154         | This study             |
| Ss58         | -          | <i>S. schenckii</i>    | Human sporotrichosis  | São Paulo, Brazil         | 557bp                   | H81              | KF943646                 | KJ020414           | KF961119         | This study             |
| Ss59         | -          | <i>S. schenckii</i>    | Human sporotrichosis  | São Paulo, Brazil         | 557bp                   | H55              | KF943647                 | KJ020415           | KF961168         | This study             |
| Ss60         | -          | <i>S. schenckii</i>    | Human sporotrichosis  | São Paulo, Brazil         | 557bp                   | H82              | KF943648                 | KJ020416           | -                | This study             |
| Ss61         | -          | <i>S. schenckii</i>    | Soil                  | São Paulo, Brazil         | 557bp                   | H83              | KF561244                 | KJ020417           | KF574447         | (4)                    |
| Ss62         | CBS 132991 | <i>S. brasiliensis</i> | Human sporotrichosis  | Espírito Santo, Brazil    | 1157bp                  | H10              | JX077113                 | KJ020418           | KF961120         | (2)                    |
| Ss63         | CBS 132968 | <i>S. schenckii</i>    | Human sporotrichosis  | Espírito Santo, Brazil    | 557bp                   | H53              | JX077123                 | KJ020419           | KF961121         | (2)                    |
| Ss64         | -          | <i>S. schenckii</i>    | Human sporotrichosis  | Espírito Santo, Brazil    | 557bp                   | H53              | JX077124                 | KJ020420           | KF961169         | (2)                    |
| Ss65         | -          | <i>S. brasiliensis</i> | Human sporotrichosis  | Rio de Janeiro, Brazil    | 1157bp                  | H01              | JX077114                 | KJ020421           | -                | (2)                    |

| Isolate code | CBS code   | Species                | Source               | Origin                 | mtDNA type <sup>a</sup> | Hap <sup>b</sup> | GenBank accession number |                    |                  | Reference <sup>f</sup> |
|--------------|------------|------------------------|----------------------|------------------------|-------------------------|------------------|--------------------------|--------------------|------------------|------------------------|
|              |            |                        |                      |                        |                         |                  | CAL <sup>c</sup>         | mtDNA <sup>d</sup> | ITS <sup>e</sup> |                        |
| Ss66         | -          | <i>S. brasiliensis</i> | Human sporotrichosis | Rio de Janeiro, Brazil | 1157bp                  | H07              | KF943649                 | KJ020422           | -                | This study             |
| Ss67         | -          | <i>S. brasiliensis</i> | Human sporotrichosis | Rio de Janeiro, Brazil | 1157bp                  | H08              | KF943650                 | KJ020423           | -                | This study             |
| Ss68         | -          | <i>S. brasiliensis</i> | Human sporotrichosis | Rio de Janeiro, Brazil | 1157bp                  | H11              | JX077115                 | KJ020424           | -                | (2)                    |
| Ss69         | -          | <i>S. brasiliensis</i> | Human sporotrichosis | Rio de Janeiro, Brazil | 1157bp                  | H12              | KC693849                 | KJ020425           | KF961122         | (1)                    |
| Ss70         | -          | <i>S. brasiliensis</i> | Human sporotrichosis | Rio de Janeiro, Brazil | 1157bp                  | H01              | KC693850                 | KJ020426           | -                | (1)                    |
| Ss71         | -          | <i>S. brasiliensis</i> | Human sporotrichosis | Rio de Janeiro, Brazil | 1157bp                  | H01              | KC693851                 | KJ020427           | -                | (1)                    |
| Ss72         | -          | <i>S. brasiliensis</i> | Human sporotrichosis | Rio de Janeiro, Brazil | 1157bp                  | H01              | KC693852                 | KJ020428           | -                | (1)                    |
| Ss73         | -          | <i>S. schenckii</i>    | Human sporotrichosis | Rio de Janeiro, Brazil | 557bp                   | H83              | KC693853                 | KJ020429           | KF961170         | (1)                    |
| Ss74         | -          | <i>S. brasiliensis</i> | Human sporotrichosis | Rio de Janeiro, Brazil | 1157bp                  | H01              | KF943651                 | KJ020430           | -                | This study             |
| Ss75         | -          | <i>S. schenckii</i>    | Human sporotrichosis | Rio de Janeiro, Brazil | 557bp                   | H84              | KC693854                 | KJ020431           | KF961123         | (1)                    |
| Ss76         | -          | <i>S. brasiliensis</i> | Human sporotrichosis | Rio de Janeiro, Brazil | 1157bp                  | H05              | KF943652                 | KJ020432           | -                | This study             |
| Ss77         | -          | <i>S. brasiliensis</i> | Human sporotrichosis | Rio de Janeiro, Brazil | 1157bp                  | H13              | KF943653                 | KJ020433           | -                | This study             |
| Ss78         | -          | <i>S. schenckii</i>    | Human sporotrichosis | Rio de Janeiro, Brazil | 557bp                   | H85              | KC693855                 | KJ020434           | KF961171         | (1)                    |
| Ss79         | -          | <i>S. brasiliensis</i> | Human sporotrichosis | Rio de Janeiro, Brazil | 1157bp                  | H01              | KC693856                 | KJ020435           | -                | (1)                    |
| Ss80         | CBS 132969 | <i>S. schenckii</i>    | Human sporotrichosis | Rio de Janeiro, Brazil | 557bp                   | H68              | JX077125                 | KJ020436           | KF961124         | (2)                    |
| Ss81         | -          | <i>S. brasiliensis</i> | Human sporotrichosis | Rio de Janeiro, Brazil | 1157bp                  | H14              | KF943654                 | KJ020437           | -                | This study             |
| Ss82         | CBS 132992 | <i>S. brasiliensis</i> | Human sporotrichosis | Rio de Janeiro, Brazil | 1157bp                  | H01              | KC693857                 | KJ020438           | KF961125         | (1)                    |
| Ss83         | -          | <i>S. brasiliensis</i> | Human sporotrichosis | Rio de Janeiro, Brazil | 1157bp                  | H01              | KF943655                 | KJ020439           | -                | This study             |
| Ss84         | -          | <i>S. brasiliensis</i> | Human sporotrichosis | Rio de Janeiro, Brazil | 1157bp                  | H01              | KF943656                 | KJ020440           | -                | This study             |
| Ss85         | -          | <i>S. brasiliensis</i> | Human sporotrichosis | Rio de Janeiro, Brazil | 1157bp                  | H01              | KF943657                 | KJ020441           | -                | This study             |
| Ss86         | -          | <i>S. brasiliensis</i> | Human sporotrichosis | Rio de Janeiro, Brazil | 1157bp                  | H01              | KF943658                 | KJ020442           | -                | This study             |
| Ss87         | CBS 132993 | <i>S. brasiliensis</i> | Human sporotrichosis | Rio de Janeiro, Brazil | 1157bp                  | H01              | KC693858                 | KJ020443           | KF961126         | (1)                    |
| Ss88         | -          | <i>S. brasiliensis</i> | Human sporotrichosis | Rio de Janeiro, Brazil | 1157bp                  | H01              | KF943659                 | KJ020444           | -                | This study             |
| Ss89         | -          | <i>S. brasiliensis</i> | Human sporotrichosis | Rio de Janeiro, Brazil | 1157bp                  | H15              | KF943660                 | KJ020445           | -                | This study             |
| Ss90         | -          | <i>S. schenckii</i>    | Human sporotrichosis | Rio de Janeiro, Brazil | 557bp                   | H52              | KC693859                 | KJ020446           | -                | (1)                    |
| Ss91         | -          | <i>S. brasiliensis</i> | Human sporotrichosis | Rio de Janeiro, Brazil | 1157bp                  | H16              | KF943661                 | KJ020447           | -                | This study             |
| Ss92         | -          | <i>S. brasiliensis</i> | Human sporotrichosis | Rio de Janeiro, Brazil | 1157bp                  | H17              | KF943662                 | KJ020448           | -                | This study             |
| Ss93         | -          | <i>S. brasiliensis</i> | Human sporotrichosis | Rio de Janeiro, Brazil | 1157bp                  | H18              | KF943663                 | KJ020449           | -                | This study             |
| Ss94         | -          | <i>S. brasiliensis</i> | Human sporotrichosis | Rio de Janeiro, Brazil | 1157bp                  | H19              | KF943664                 | KJ020450           | -                | This study             |
| Ss95         | -          | <i>S. brasiliensis</i> | Human sporotrichosis | Rio de Janeiro, Brazil | 1157bp                  | H20              | KF943665                 | KJ020451           | -                | This study             |
| Ss96         | -          | <i>S. brasiliensis</i> | Human sporotrichosis | Rio de Janeiro, Brazil | 1157bp                  | H01              | KF943666                 | KJ020452           | -                | This study             |
| Ss97         | -          | <i>S. brasiliensis</i> | Human sporotrichosis | Rio de Janeiro, Brazil | 1157bp                  | H21              | KF943667                 | KJ020453           | -                | This study             |

| Isolate code | CBS code   | Species                | Source               | Origin                 | mtDNA type <sup>a</sup> | Hap <sup>b</sup> | GenBank accession number |                    |                  | Reference <sup>f</sup> |
|--------------|------------|------------------------|----------------------|------------------------|-------------------------|------------------|--------------------------|--------------------|------------------|------------------------|
|              |            |                        |                      |                        |                         |                  | CAL <sup>c</sup>         | mtDNA <sup>d</sup> | ITS <sup>e</sup> |                        |
| Ss98         | -          | <i>S. brasiliensis</i> | Human sporotrichosis | Rio de Janeiro, Brazil | 1157bp                  | H22              | KF943668                 | KJ020454           | -                | This study             |
| Ss99         | -          | <i>S. brasiliensis</i> | Human sporotrichosis | Rio de Janeiro, Brazil | 1157bp                  | H23              | KF574460                 | KJ020455           | KF574442         | (4)                    |
| Ss100        | -          | <i>S. brasiliensis</i> | Human sporotrichosis | Rio de Janeiro, Brazil | 1157bp                  | H01              | KF943669                 | KJ020456           | -                | This study             |
| Ss101        | -          | <i>S. brasiliensis</i> | Human sporotrichosis | S ão Paulo, Brazil     | 1157bp                  | H24              | KF943670                 | KJ020457           | -                | This study             |
| Ss102        | CBS 132970 | <i>S. schenckii</i>    | Human sporotrichosis | S ão Paulo, Brazil     | 557bp                   | H53              | KF943671                 | KJ020458           | KF961172         | This study             |
| Ss103        | -          | <i>S. schenckii</i>    | Human sporotrichosis | S ão Paulo, Brazil     | 1157bp                  | H33              | KF943672                 | KJ020459           | -                | This study             |
| Ss104        | -          | <i>S. brasiliensis</i> | Human sporotrichosis | Mato Grosso, Brazil    | 1157bp                  | H01              | KF574461                 | KJ020460           | KF574443         | (4)                    |
| Ss105        | -          | <i>S. schenckii</i>    | Human sporotrichosis | Minas Gerais, Brazil   | 1157bp                  | H34              | KF943673                 | KJ020461           | KF961127         | This study             |
| Ss106        | -          | <i>S. schenckii</i>    | Human sporotrichosis | Minas Gerais, Brazil   | 557bp                   | H53              | KF943674                 | KJ020462           | -                | This study             |
| Ss107        | -          | <i>S. schenckii</i>    | Human sporotrichosis | Minas Gerais, Brazil   | 1157bp                  | H35              | KF943675                 | KJ020463           | KF961128         | This study             |
| Ss109        | -          | <i>S. schenckii</i>    | Human sporotrichosis | Minas Gerais, Brazil   | 557bp                   | H54              | KF943676                 | KJ020464           | KF961129         | This study             |
| Ss110        | -          | <i>S. schenckii</i>    | Human sporotrichosis | Minas Gerais, Brazil   | 1157bp                  | H36              | KF943677                 | KJ020465           | KF961173         | This study             |
| Ss111        | CBS 132971 | <i>S. schenckii</i>    | Human sporotrichosis | S ão Paulo, Brazil     | 1157bp                  | H37              | KC693860                 | KJ020466           | -                | (1)                    |
| Ss112        | -          | <i>S. schenckii</i>    | Human sporotrichosis | S ão Paulo, Brazil     | 557bp                   | H53              | KF943678                 | KJ020467           | -                | This study             |
| Ss113        | CBS 132972 | <i>S. schenckii</i>    | Human sporotrichosis | S ão Paulo, Brazil     | 1157bp                  | H38              | KF943679                 | KJ020468           | KF961130         | This study             |
| Ss116        | -          | <i>S. schenckii</i>    | Human sporotrichosis | S ão Paulo, Brazil     | 557bp                   | H55              | KF943680                 | KJ020469           | KF961131         | This study             |
| Ss117        | -          | <i>S. schenckii</i>    | Human sporotrichosis | S ão Paulo, Brazil     | 557bp                   | H56              | KF943681                 | KJ020470           | -                | This study             |
| Ss118        | CBS 132974 | <i>S. schenckii</i>    | Human sporotrichosis | S ão Paulo, Brazil     | 557bp                   | H57              | JX077126                 | KJ020471           | KF961174         | (2)                    |
| Ss119        | -          | <i>S. schenckii</i>    | Human sporotrichosis | S ão Paulo, Brazil     | 557bp                   | H58              | KF943682                 | KJ020472           | KF961175         | This study             |
| Ss120        | -          | <i>S. schenckii</i>    | Human sporotrichosis | S ão Paulo, Brazil     | 557bp                   | H58              | KF943683                 | KJ020473           | -                | This study             |
| Ss121        | -          | <i>S. schenckii</i>    | Human sporotrichosis | S ão Paulo, Brazil     | 557bp                   | H58              | KF943684                 | KJ020474           | -                | This study             |
| Ss122        | -          | <i>S. schenckii</i>    | Human sporotrichosis | S ão Paulo, Brazil     | 557bp                   | H59              | KF943685                 | KJ020475           | KF961132         | This study             |
| Ss123        | -          | <i>S. schenckii</i>    | Human sporotrichosis | S ão Paulo, Brazil     | 557bp                   | H60              | KF943686                 | KJ020476           | KF961133         | This study             |
| Ss124        | -          | <i>S. schenckii</i>    | Human sporotrichosis | S ão Paulo, Brazil     | 557bp                   | H57              | KF943687                 | KJ020477           | KF961176         | This study             |
| Ss125        | -          | <i>S. brasiliensis</i> | Human sporotrichosis | S ão Paulo, Brazil     | 1157bp                  | H25              | JX077116                 | KJ020478           | -                | (2)                    |
| Ss126        | -          | <i>S. schenckii</i>    | Human sporotrichosis | S ão Paulo, Brazil     | 557bp                   | H53              | JQ041904                 | KJ020479           | JN885581         | (3)                    |
| Ss127        | -          | <i>S. schenckii</i>    | Human sporotrichosis | S ão Paulo, Brazil     | 557bp                   | H53              | KF943688                 | KJ020480           | -                | This study             |
| Ss128        | -          | <i>S. brasiliensis</i> | Human sporotrichosis | S ão Paulo, Brazil     | 1157bp                  | H26              | KC693861                 | KJ020481           | KF961155         | (1)                    |
| Ss129        | -          | <i>S. schenckii</i>    | Human sporotrichosis | S ão Paulo, Brazil     | 557bp                   | H61              | KF943689                 | KJ020482           | KF961134         | This study             |
| Ss130        | -          | <i>S. schenckii</i>    | Human sporotrichosis | Pernambuco, Brazil     | 1157bp                  | H39              | KF943690                 | KJ020483           | KF961135         | This study             |
| Ss131        | CBS 132926 | <i>S. mexicana</i>     | Human sporotrichosis | Pernambuco, Brazil     | -                       | -                | JF811339                 | -                  | -                | (2)                    |
| Ss132        | CBS 132927 | <i>S. mexicana</i>     | Human sporotrichosis | S ão Paulo, Brazil     | -                       | -                | JF811340                 | -                  | KF574457         | (2)                    |

| Isolate code | CBS code   | Species                | Source                | Origin                    | mtDNA type <sup>a</sup> | Hap <sup>b</sup> | GenBank accession number |                    |                  | Reference <sup>f</sup> |
|--------------|------------|------------------------|-----------------------|---------------------------|-------------------------|------------------|--------------------------|--------------------|------------------|------------------------|
|              |            |                        |                       |                           |                         |                  | CAL <sup>c</sup>         | mtDNA <sup>d</sup> | ITS <sup>e</sup> |                        |
| Ss133        | CBS 132928 | <i>S. mexicana</i>     | Human sporotrichosis  | Pernambuco, Brazil        | -                       | -                | JF811341                 | -                  | KF961182         | (2)                    |
| Ss134        | -          | <i>S. schenckii</i>    | Human sporotrichosis  | Pernambuco, Brazil        | -                       | -                | This study               | -                  | -                | This study             |
| Ss135        | -          | <i>S. schenckii</i>    | Human sporotrichosis  | Pernambuco, Brazil        | 557bp                   | H53              | KF943691                 | KJ020484           | -                | This study             |
| Ss136        | -          | <i>S. schenckii</i>    | Human sporotrichosis  | Pernambuco, Brazil        | 557bp                   | H53              | KF943692                 | KJ020485           | KF961177         | This study             |
| Ss137        | -          | <i>S. schenckii</i>    | Human sporotrichosis  | Pernambuco, Brazil        | 557bp                   | H57              | KF574462                 | KJ020486           | KF574448         | (4)                    |
| Ss138        | -          | <i>S. schenckii</i>    | Human sporotrichosis  | Paraíba, Brazil           | 557bp                   | H62              | KF943693                 | KJ020487           | KF961136         | This study             |
| Ss139        | -          | <i>S. schenckii</i>    | Human sporotrichosis  | Paraíba, Brazil           | 557bp                   | H63              | KF943694                 | KJ020488           | -                | This study             |
| Ss140        | -          | <i>S. brasiliensis</i> | Human sporotrichosis  | Paraíba, Brazil           | -                       | -                | KF574463                 | -                  | KF574449         | (4)                    |
| Ss141        | CBS 132975 | <i>S. schenckii</i>    | Human sporotrichosis  | Brasília, Brazil          | 557bp                   | H58              | JQ041905                 | KJ020489           | JN885582         | (3)                    |
| Ss143        | -          | <i>S. schenckii</i>    | Human sporotrichosis  | Paraná, Brazil            | 557bp                   | H50              | JQ041906                 | KJ020490           | JN885583         | (2)                    |
| Ss144        | -          | <i>S. schenckii</i>    | Human sporotrichosis  | Rio Grande do Sul, Brazil | 557bp                   | H57              | KF943695                 | KJ020491           | KF961178         | This study             |
| Ss145        | -          | <i>S. brasiliensis</i> | Human sporotrichosis  | Rio Grande do Sul, Brazil | 1157bp                  | H01              | KF943696                 | KJ020492           | -                | This study             |
| Ss148        | -          | <i>S. brasiliensis</i> | Human sporotrichosis  | São Paulo, Brazil         | 1157bp                  | H01              | KF943697                 | KJ020493           | -                | This study             |
| Ss149        | -          | <i>S. brasiliensis</i> | Human sporotrichosis  | Rio Grande do Sul, Brazil | 1157bp                  | H01              | KC693862                 | KJ020494           | -                | (1)                    |
| Ss150        | -          | <i>S. brasiliensis</i> | Human sporotrichosis  | Rio Grande do Sul, Brazil | 1157bp                  | H01              | KC693863                 | KJ020495           | -                | (1)                    |
| Ss151        | CBS 132994 | <i>S. brasiliensis</i> | Canine sporotrichosis | Rio Grande do Sul, Brazil | 1157bp                  | H01              | KC693864                 | KJ020496           | -                | (1)                    |
| Ss152        | CBS 132995 | <i>S. brasiliensis</i> | Feline sporotrichosis | Rio Grande do Sul, Brazil | 1157bp                  | H27              | KC693865                 | KJ020497           | -                | (1)                    |
| Ss153        | CBS 132996 | <i>S. brasiliensis</i> | Feline sporotrichosis | Rio Grande do Sul, Brazil | 1157bp                  | H01              | KC693866                 | KJ020498           | -                | (1)                    |
| Ss154        | -          | <i>S. brasiliensis</i> | Feline sporotrichosis | Rio Grande do Sul, Brazil | 1157bp                  | H01              | KC693867                 | KJ020499           | -                | (1)                    |
| Ss155        | -          | <i>S. brasiliensis</i> | Feline sporotrichosis | Rio Grande do Sul, Brazil | 1157bp                  | H01              | KC693868                 | KJ020500           | -                | (1)                    |
| Ss156        | CBS 132997 | <i>S. brasiliensis</i> | Feline sporotrichosis | Rio Grande do Sul, Brazil | 1157bp                  | H28              | KC693869                 | KJ020501           | -                | (1)                    |
| Ss157        | CBS 132998 | <i>S. brasiliensis</i> | Feline sporotrichosis | Rio Grande do Sul, Brazil | 1157bp                  | H01              | KC693870                 | KJ020502           | -                | (1)                    |
| Ss158        | -          | <i>S. schenckii</i>    | Human sporotrichosis  | Amazonas, Brazil          | 557bp                   | H64              | KF943698                 | KJ020503           | KF961137         | This study             |
| Ss171        | CBS 132999 | <i>S. brasiliensis</i> | Feline sporotrichosis | Paraná, Brazil            | -                       | -                | KC693871                 | -                  | -                | (1)                    |
| Ss172        | CBS 133000 | <i>S. brasiliensis</i> | Feline sporotrichosis | Paraná, Brazil            | -                       | -                | KC693872                 | -                  | -                | (1)                    |
| Ss173        | CBS 133001 | <i>S. brasiliensis</i> | Feline sporotrichosis | Paraná, Brazil            | -                       | -                | KC693873                 | -                  | -                | (1)                    |
| Ss174        | CBS 133002 | <i>S. brasiliensis</i> | Feline sporotrichosis | Paraná, Brazil            | -                       | -                | KC693874                 | -                  | -                | (1)                    |
| Ss188        | -          | <i>S. schenckii</i>    | Human sporotrichosis  | Pernambuco, Brazil        | -                       | -                | KF943699                 | -                  | -                | This study             |
| Ss189        | -          | <i>S. schenckii</i>    | Human sporotrichosis  | Pernambuco, Brazil        | -                       | -                | KF943700                 | -                  | -                | This study             |
| Ss190        | -          | <i>S. schenckii</i>    | Human sporotrichosis  | Pernambuco, Brazil        | -                       | -                | KF943701                 | -                  | KF961138         | This study             |
| Ss192        | -          | <i>S. schenckii</i>    | Human sporotrichosis  | São Paulo, Brazil         | -                       | -                | KJ542523                 | -                  | -                | This study             |
| Ss193        | -          | <i>S. schenckii</i>    | Human sporotrichosis  | São Paulo, Brazil         | -                       | -                | KJ542524                 | -                  | -                | This study             |

| Isolate code | CBS code   | Species                | Source                | Origin                    | mtDNA type <sup>a</sup> | Hap <sup>b</sup> | GenBank accession number |                    |                  | Reference <sup>f</sup> |
|--------------|------------|------------------------|-----------------------|---------------------------|-------------------------|------------------|--------------------------|--------------------|------------------|------------------------|
|              |            |                        |                       |                           |                         |                  | CAL <sup>c</sup>         | mtDNA <sup>d</sup> | ITS <sup>e</sup> |                        |
| Ss194        | -          | <i>S. schenckii</i>    | Human sporotrichosis  | S ão Paulo, Brazil        | -                       | -                | KJ542525                 | -                  | -                | This study             |
| Ss195        | CBS 132980 | <i>S. schenckii</i>    | Human sporotrichosis  | S ão Paulo, Brazil        | -                       | -                | KJ542526                 | -                  | -                | This study             |
| Ss197        | CBS 132981 | <i>S. schenckii</i>    | Human sporotrichosis  | S ão Paulo, Brazil        | -                       | -                | KJ542527                 | -                  | -                | This study             |
| Ss198        | -          | <i>S. schenckii</i>    | Human sporotrichosis  | S ão Paulo, Brazil        | -                       | -                | KJ542528                 | -                  | -                | This study             |
| Ss199        | -          | <i>S. schenckii</i>    | Human sporotrichosis  | S ão Paulo, Brazil        | -                       | -                | KJ542529                 | -                  | -                | This study             |
| Ss200        | CBS 132982 | <i>S. schenckii</i>    | Human sporotrichosis  | S ão Paulo, Brazil        | -                       | -                | KJ542530                 | -                  | KF961139         | This study             |
| Ss201        | CBS 132983 | <i>S. schenckii</i>    | Human sporotrichosis  | S ão Paulo, Brazil        | -                       | -                | KJ542531                 | -                  | -                | This study             |
| Ss202        | -          | <i>S. schenckii</i>    | Human sporotrichosis  | S ão Paulo, Brazil        | -                       | -                | KJ542532                 | -                  | -                | This study             |
| Ss203        | -          | <i>S. schenckii</i>    | Human sporotrichosis  | S ão Paulo, Brazil        | -                       | -                | KJ542533                 | -                  | -                | This study             |
| Ss204        | -          | <i>S. schenckii</i>    | Human sporotrichosis  | S ão Paulo, Brazil        | -                       | -                | KJ542534                 | -                  | -                | This study             |
| Ss205        | -          | <i>S. schenckii</i>    | Human sporotrichosis  | S ão Paulo, Brazil        | -                       | -                | KJ542535                 | -                  | -                | This study             |
| Ss206        | -          | <i>S. schenckii</i>    | Human sporotrichosis  | S ão Paulo, Brazil        | -                       | -                | KJ542536                 | -                  | -                | This study             |
| Ss207        | -          | <i>S. schenckii</i>    | Human sporotrichosis  | S ão Paulo, Brazil        | -                       | -                | KJ542537                 | -                  | -                | This study             |
| Ss208        | -          | <i>S. schenckii</i>    | Human sporotrichosis  | S ão Paulo, Brazil        | -                       | -                | KJ542538                 | -                  | -                | This study             |
| Ss209        | -          | <i>S. schenckii</i>    | Human sporotrichosis  | S ão Paulo, Brazil        | -                       | -                | KJ542539                 | -                  | KF961140         | This study             |
| Ss210        | -          | <i>S. schenckii</i>    | Human sporotrichosis  | S ão Paulo, Brazil        | -                       | -                | KJ542540                 | -                  | -                | This study             |
| Ss226        | CBS 133003 | <i>S. brasiliensis</i> | Feline sporotrichosis | S ão Paulo, Brazil        | -                       | -                | KC693875                 | -                  | -                | (1)                    |
| Ss227        | CBS 133004 | <i>S. brasiliensis</i> | Canine sporotrichosis | S ão Paulo, Brazil        | -                       | -                | KC693876                 | -                  | -                | (1)                    |
| Ss236        | CBS 132925 | <i>S. globosa</i>      | Human sporotrichosis  | Minas Gerais, Brazil      | 557bp                   | H89              | KC693877                 | KJ020524           | KF961181         | (1)                    |
| Ss237        | -          | <i>S. brasiliensis</i> | Human sporotrichosis  | Esp íto Santo, Brazil     | -                       | -                | KF943702                 | -                  | -                | This study             |
| Ss239        | -          | <i>S. schenckii</i>    | Human sporotrichosis  | S ão Paulo, Brazil        | -                       | -                | KF943703                 | -                  | -                | This study             |
| Ss240        | -          | <i>S. schenckii</i>    | Human sporotrichosis  | S ão Paulo, Brazil        | -                       | -                | KF943704                 | -                  | KF961141         | This study             |
| Ss241        | -          | <i>S. schenckii</i>    | Human sporotrichosis  | S ão Paulo, Brazil        | -                       | -                | KF943705                 | -                  | -                | This study             |
| Ss242        | -          | <i>S. schenckii</i>    | Human sporotrichosis  | Rio Grande do Sul, Brazil | -                       | -                | KF943706                 | -                  | -                | This study             |
| Ss244        | -          | <i>S. brasiliensis</i> | Human sporotrichosis  | Cear á Brazil             | -                       | -                | KF943707                 | -                  | -                | This study             |
| Ss245        | CBS 133005 | <i>S. brasiliensis</i> | Feline sporotrichosis | Rio de Janeiro, Brazil    | 1157bp                  | H29              | KC693878                 | KJ020525           | -                | (1)                    |
| Ss246        | CBS 133002 | <i>S. brasiliensis</i> | Feline sporotrichosis | Rio de Janeiro, Brazil    | 1157bp                  | H29              | KC693879                 | KJ020526           | -                | (1)                    |
| Ss247        | CBS 133006 | <i>S. brasiliensis</i> | Feline sporotrichosis | Rio de Janeiro, Brazil    | 1157bp                  | H29              | KC693880                 | KJ020527           | -                | (1)                    |
| Ss248        | CBS 133007 | <i>S. brasiliensis</i> | Feline sporotrichosis | Rio de Janeiro, Brazil    | 1157bp                  | H29              | KC693881                 | KJ020528           | -                | (1)                    |
| Ss249        | CBS 133008 | <i>S. brasiliensis</i> | Feline sporotrichosis | Rio de Janeiro, Brazil    | 1157bp                  | H29              | KC693882                 | KJ020529           | -                | (1)                    |
| Ss250        | CBS 133009 | <i>S. brasiliensis</i> | Feline sporotrichosis | Rio de Janeiro, Brazil    | 1157bp                  | H29              | KC693883                 | KJ020530           | -                | (1)                    |
| Ss251        | CBS 133010 | <i>S. brasiliensis</i> | Feline sporotrichosis | Rio de Janeiro, Brazil    | 1157bp                  | H29              | KC693884                 | KJ020531           | -                | (1)                    |

| Isolate code           | CBS code   | Species                | Source                | Origin                    | mtDNA type <sup>a</sup> | Hap <sup>b</sup> | GenBank accession number |                    |                  | Reference <sup>f</sup> |
|------------------------|------------|------------------------|-----------------------|---------------------------|-------------------------|------------------|--------------------------|--------------------|------------------|------------------------|
|                        |            |                        |                       |                           |                         |                  | CAL <sup>c</sup>         | mtDNA <sup>d</sup> | ITS <sup>e</sup> |                        |
| Ss252                  | CBS 133011 | <i>S. brasiliensis</i> | Feline sporotrichosis | Rio de Janeiro, Brazil    | 1157bp                  | H29              | KC693885                 | KJ020532           | -                | (1)                    |
| Ss253                  | CBS 133012 | <i>S. brasiliensis</i> | Feline sporotrichosis | Rio de Janeiro, Brazil    | 1157bp                  | H29              | KC693886                 | KJ020533           | -                | (1)                    |
| Ss254                  | CBS 133013 | <i>S. brasiliensis</i> | Feline sporotrichosis | Rio de Janeiro, Brazil    | 1157bp                  | H29              | KC693887                 | KJ020534           | -                | (1)                    |
| Ss255                  | CBS 133014 | <i>S. brasiliensis</i> | Feline sporotrichosis | Rio de Janeiro, Brazil    | -                       | -                | KC693888                 | -                  | -                | (1)                    |
| Ss256                  | CBS 133015 | <i>S. brasiliensis</i> | Feline sporotrichosis | Rio de Janeiro, Brazil    | -                       | -                | KC693889                 | -                  | -                | (1)                    |
| Ss257                  | CBS 133016 | <i>S. brasiliensis</i> | Feline sporotrichosis | Rio de Janeiro, Brazil    | -                       | -                | KC693890                 | -                  | -                | (1)                    |
| Ss258                  | CBS 133017 | <i>S. brasiliensis</i> | Feline sporotrichosis | Rio de Janeiro, Brazil    | -                       | -                | KC693891                 | -                  | -                | (1)                    |
| Ss259                  | CBS 133018 | <i>S. brasiliensis</i> | Feline sporotrichosis | Rio de Janeiro, Brazil    | -                       | -                | KC693892                 | -                  | -                | (1)                    |
| Ss260                  | CBS 133019 | <i>S. brasiliensis</i> | Feline sporotrichosis | Rio Grande do Sul, Brazil | -                       | -                | KC693893                 | -                  | -                | (1)                    |
| Ss261                  | -          | <i>S. brasiliensis</i> | Human sporotrichosis  | Rio Grande do Sul, Brazil | -                       | -                | KC693894                 | -                  | -                | (1)                    |
| Ss265                  | CBS 133020 | <i>S. brasiliensis</i> | Human sporotrichosis  | Minas Gerais, Brazil      | -                       | -                | JN204360                 | -                  | KF574445         | (5)                    |
| ATCC 4823 <sup>G</sup> | CBS 132021 | <i>S. brasiliensis</i> | Feline sporotrichosis | Rio de Janeiro, Brazil    | 1157bp                  | H01              | KF574459                 | KJ020535           | JQ070114         | (4)                    |
| IPEC17521              | CBS 130107 | <i>S. brasiliensis</i> | Human sporotrichosis  | Rio de Janeiro, Brazil    | -                       | -                | AM116874                 | -                  | KC113214         | (6, 7)                 |
| IPEC16503              |            | <i>S. brasiliensis</i> | Human sporotrichosis  | Rio de Janeiro, Brazil    | -                       | -                | AM116875                 | -                  | -                | (6, 7)                 |
| FMR 8337               |            | <i>S. brasiliensis</i> | Environmental         | Rio de Janeiro, Brazil    | -                       | -                | AM116876                 | -                  | -                | (6, 7)                 |
| IPEC16243              |            | <i>S. brasiliensis</i> | Human sporotrichosis  | Rio de Janeiro, Brazil    | -                       | -                | AM116877                 | -                  | -                | (6, 7)                 |
| IPEC17943              |            | <i>S. brasiliensis</i> | Human sporotrichosis  | Rio de Janeiro, Brazil    | -                       | -                | AM116878                 | -                  | -                | (6, 7)                 |
| IPEC22496.5            |            | <i>S. brasiliensis</i> | Human sporotrichosis  | Rio de Janeiro, Brazil    | -                       | -                | AM116879                 | -                  | -                | (6, 7)                 |
| IPEC17331              |            | <i>S. brasiliensis</i> | Human sporotrichosis  | Rio de Janeiro, Brazil    | -                       | -                | AM116880                 | -                  | -                | (6, 7)                 |
| IPEC22542/2            |            | <i>S. brasiliensis</i> | Human sporotrichosis  | Rio de Janeiro, Brazil    | -                       | -                | AM116881                 | -                  | -                | (6, 7)                 |
| IPEC22486              |            | <i>S. brasiliensis</i> | Human sporotrichosis  | Rio de Janeiro, Brazil    | -                       | -                | AM116882                 | -                  | -                | (6, 7)                 |
| IPEC22493.2            |            | <i>S. brasiliensis</i> | Human sporotrichosis  | Rio de Janeiro, Brazil    | -                       | -                | AM116883                 | -                  | -                | (6, 7)                 |
| IPEC17786              |            | <i>S. brasiliensis</i> | Human sporotrichosis  | Rio de Janeiro, Brazil    | -                       | -                | AM116884                 | -                  | -                | (6, 7)                 |
| IPEC16042              |            | <i>S. brasiliensis</i> | Human sporotrichosis  | Rio de Janeiro, Brazil    | -                       | -                | AM116885                 | -                  | -                | (6, 7)                 |
| IPEC15572              |            | <i>S. brasiliensis</i> | Human sporotrichosis  | Rio de Janeiro, Brazil    | -                       | -                | AM116886                 | -                  | FN549903         | (6, 7)                 |
| IPEC17585              |            | <i>S. brasiliensis</i> | Human sporotrichosis  | Rio de Janeiro, Brazil    | -                       | -                | AM116887                 | -                  | -                | (6, 7)                 |
| IPEC17920              |            | <i>S. brasiliensis</i> | Human sporotrichosis  | Rio de Janeiro, Brazil    | -                       | -                | AM116888                 | -                  | -                | (6, 7)                 |
| IPEC16864              |            | <i>S. brasiliensis</i> | Human sporotrichosis  | Rio de Janeiro, Brazil    | -                       | -                | AM116889                 | -                  | -                | (6, 7)                 |
| IPEC17608              |            | <i>S. brasiliensis</i> | Human sporotrichosis  | Rio de Janeiro, Brazil    | -                       | -                | AM116890                 | -                  | -                | (6, 7)                 |
| IPEC22582              | CBS 130109 | <i>S. brasiliensis</i> | Human sporotrichosis  | Rio de Janeiro, Brazil    | -                       | -                | AM116891                 | -                  | KC113213         | (6, 7)                 |
| IPEC16550              |            | <i>S. brasiliensis</i> | Human sporotrichosis  | Rio de Janeiro, Brazil    | -                       | -                | AM116892                 | -                  | -                | (6, 7)                 |
| IPEC22593              |            | <i>S. brasiliensis</i> | Human sporotrichosis  | Rio de Janeiro, Brazil    | -                       | -                | AM116893                 | -                  | -                | (6, 7)                 |

| Isolate code           | CBS code | Species                | Source               | Origin                 | mtDNA type <sup>a</sup> | Hap <sup>b</sup> | GenBank accession number |                    |                  | Reference <sup>f</sup> |
|------------------------|----------|------------------------|----------------------|------------------------|-------------------------|------------------|--------------------------|--------------------|------------------|------------------------|
|                        |          |                        |                      |                        |                         |                  | CAL <sup>c</sup>         | mtDNA <sup>d</sup> | ITS <sup>e</sup> |                        |
| IPEC22493.1            |          | <i>S. brasiliensis</i> | Human sporotrichosis | Rio de Janeiro, Brazil | -                       | -                | AM116894                 | -                  | -                | (6, 7)                 |
| IPEC22496.4            |          | <i>S. brasiliensis</i> | Human sporotrichosis | Rio de Janeiro, Brazil | -                       | -                | AM116895                 | -                  | -                | (6, 7)                 |
| IPEC17307              |          | <i>S. brasiliensis</i> | Human sporotrichosis | Rio de Janeiro, Brazil | -                       | -                | AM116896                 | -                  | -                | (6, 7)                 |
| IPEC16456              |          | <i>S. brasiliensis</i> | Human sporotrichosis | Rio de Janeiro, Brazil | -                       | -                | AM116897                 | -                  | -                | (6, 7)                 |
| IPEC16919              |          | <i>S. brasiliensis</i> | Human sporotrichosis | Rio de Janeiro, Brazil | -                       | -                | AM116898                 | -                  | KF574441         | (6-8)                  |
| IPEC16490 <sup>T</sup> |          | <i>S. brasiliensis</i> | Human sporotrichosis | Rio de Janeiro, Brazil | 1157bp                  | H01              | AM116899                 | KJ020512           | KF574440         | (6-8)                  |
| IPEC17692              |          | <i>S. brasiliensis</i> | Human sporotrichosis | Rio de Janeiro, Brazil | -                       | -                | AM159127                 | -                  | -                | (6, 7)                 |
| FMR 9034               |          | <i>S. brasiliensis</i> | Human sporotrichosis | S ão Paulo, Brazil     | -                       | -                | AM261688                 | -                  | -                | (6, 7)                 |
| FMR 9035               |          | <i>S. brasiliensis</i> | Human sporotrichosis | S ão Paulo, Brazil     | -                       | -                | AM261689                 | -                  | -                | (6, 7)                 |
| IPEC28487              |          | <i>S. brasiliensis</i> | Human sporotrichosis | Rio de Janeiro, Brazil | -                       | -                | HQ426928                 | -                  | -                | (9)                    |
| IPEC17692              |          | <i>S. brasiliensis</i> | Human sporotrichosis | Rio de Janeiro, Brazil | -                       | -                | HQ426929                 | -                  | -                | (9)                    |
| IPEC17786A             |          | <i>S. brasiliensis</i> | Human sporotrichosis | Rio de Janeiro, Brazil | -                       | -                | HQ426931                 | -                  | -                | (9)                    |
| IPEC17878              |          | <i>S. brasiliensis</i> | Human sporotrichosis | Rio de Janeiro, Brazil | -                       | -                | HQ426932                 | -                  | -                | (9)                    |
| IPEC18782A             |          | <i>S. brasiliensis</i> | Human sporotrichosis | Rio de Janeiro, Brazil | -                       | -                | HQ426933                 | -                  | -                | (9)                    |
| IPEC18782B             |          | <i>S. brasiliensis</i> | Human sporotrichosis | Rio de Janeiro, Brazil | -                       | -                | HQ426934                 | -                  | -                | (9)                    |
| IPEC25011              |          | <i>S. brasiliensis</i> | Human sporotrichosis | Rio de Janeiro, Brazil | -                       | -                | HQ426935                 | -                  | -                | (9)                    |
| IPEC25521              |          | <i>S. brasiliensis</i> | Human sporotrichosis | Rio de Janeiro, Brazil | -                       | -                | HQ426936                 | -                  | -                | (9)                    |
| IPEC26611              |          | <i>S. brasiliensis</i> | Human sporotrichosis | Rio de Janeiro, Brazil | -                       | -                | HQ426937                 | -                  | -                | (9)                    |
| IPEC26938              |          | <i>S. brasiliensis</i> | Human sporotrichosis | Rio de Janeiro, Brazil | -                       | -                | HQ426938                 | -                  | -                | (9)                    |
| IPEC26945              |          | <i>S. brasiliensis</i> | Human sporotrichosis | Rio de Janeiro, Brazil | -                       | -                | HQ426939                 | -                  | -                | (9)                    |
| IPEC27022              |          | <i>S. brasiliensis</i> | Human sporotrichosis | Rio de Janeiro, Brazil | -                       | -                | HQ426940                 | -                  | -                | (9)                    |
| IPEC27052              |          | <i>S. brasiliensis</i> | Human sporotrichosis | Rio de Janeiro, Brazil | -                       | -                | HQ426941                 | -                  | -                | (9)                    |
| IPEC27087              |          | <i>S. brasiliensis</i> | Human sporotrichosis | Rio de Janeiro, Brazil | -                       | -                | HQ426942                 | -                  | -                | (9)                    |
| IPEC27130              |          | <i>S. brasiliensis</i> | Human sporotrichosis | Rio de Janeiro, Brazil | -                       | -                | HQ426943                 | -                  | -                | (9)                    |
| IPEC27177-2            |          | <i>S. brasiliensis</i> | Human sporotrichosis | Rio de Janeiro, Brazil | -                       | -                | HQ426944                 | -                  | -                | (9)                    |
| IPEC27288              |          | <i>S. brasiliensis</i> | Human sporotrichosis | Rio de Janeiro, Brazil | -                       | -                | HQ426945                 | -                  | -                | (9)                    |
| IPEC27209              |          | <i>S. brasiliensis</i> | Human sporotrichosis | Rio de Janeiro, Brazil | -                       | -                | HQ426946                 | -                  | -                | (9)                    |
| IPEC27372              |          | <i>S. brasiliensis</i> | Human sporotrichosis | Rio de Janeiro, Brazil | -                       | -                | HQ426947                 | -                  | -                | (9)                    |
| IPEC27387              |          | <i>S. brasiliensis</i> | Human sporotrichosis | Rio de Janeiro, Brazil | -                       | -                | HQ426948                 | -                  | -                | (9)                    |
| IPEC27417              |          | <i>S. brasiliensis</i> | Human sporotrichosis | Rio de Janeiro, Brazil | -                       | -                | HQ426949                 | -                  | -                | (9)                    |
| IPEC27445-3            |          | <i>S. brasiliensis</i> | Human sporotrichosis | Rio de Janeiro, Brazil | -                       | -                | HQ426950                 | -                  | -                | (9)                    |
| IPEC27930              |          | <i>S. brasiliensis</i> | Human sporotrichosis | Rio de Janeiro, Brazil | -                       | -                | HQ426951                 | -                  | -                | (9)                    |



| Isolate code | CBS code   | Species                | Source                | Origin                 | mtDNA type <sup>a</sup> | Hap <sup>b</sup> | GenBank accession number |                    |                  | Reference <sup>f</sup> |
|--------------|------------|------------------------|-----------------------|------------------------|-------------------------|------------------|--------------------------|--------------------|------------------|------------------------|
|              |            |                        |                       |                        |                         |                  | CAL <sup>c</sup>         | mtDNA <sup>d</sup> | ITS <sup>e</sup> |                        |
| IPEC34067    |            | <i>S. brasiliensis</i> | Human sporotrichosis  | Rio de Janeiro, Brazil | -                       | -                | HQ426952                 | -                  | -                | (9)                    |
| IPEC28604    |            | <i>S. brasiliensis</i> | Human sporotrichosis  | Rio de Janeiro, Brazil | -                       | -                | HQ426953                 | -                  | -                | (9)                    |
| IPEC28701    |            | <i>S. brasiliensis</i> | Human sporotrichosis  | Rio de Janeiro, Brazil | -                       | -                | HQ426954                 | -                  | -                | (9)                    |
| IPEC28772    |            | <i>S. brasiliensis</i> | Human sporotrichosis  | Rio de Janeiro, Brazil | -                       | -                | HQ426955                 | -                  | -                | (9)                    |
| IPEC28790    |            | <i>S. brasiliensis</i> | Human sporotrichosis  | Rio de Janeiro, Brazil | -                       | -                | HQ426956                 | -                  | -                | (9)                    |
| IPEC33605    |            | <i>S. brasiliensis</i> | Human sporotrichosis  | Rio de Janeiro, Brazil | -                       | -                | HQ426957                 | -                  | -                | (9)                    |
| IPEC33722-1  |            | <i>S. brasiliensis</i> | Human sporotrichosis  | Rio de Janeiro, Brazil | -                       | -                | HQ426958                 | -                  | -                | (9)                    |
| IPEC34007    |            | <i>S. brasiliensis</i> | Human sporotrichosis  | Rio de Janeiro, Brazil | -                       | -                | HQ426959                 | -                  | -                | (9)                    |
| IPEC28665    |            | <i>S. brasiliensis</i> | Human sporotrichosis  | Rio de Janeiro, Brazil | -                       | -                | JN995606                 | -                  | -                | (10)                   |
| IPEC28457    |            | <i>S. brasiliensis</i> | Human sporotrichosis  | Rio de Janeiro, Brazil | -                       | -                | JN995607                 | -                  | -                | (10)                   |
| IPEC27133    |            | <i>S. brasiliensis</i> | Human sporotrichosis  | Rio de Janeiro, Brazil | -                       | -                | JN995608                 | -                  | -                | (10)                   |
| IPEC27100    |            | <i>S. brasiliensis</i> | Human sporotrichosis  | Rio de Janeiro, Brazil | -                       | -                | JN995609                 | -                  | -                | (10)                   |
| IPEC28329    |            | <i>S. brasiliensis</i> | Human sporotrichosis  | Rio de Janeiro, Brazil | -                       | -                | JN995610                 | -                  | -                | (10)                   |
| ES211        |            | <i>S. brasiliensis</i> | Human sporotrichosis  | Esp fito Santo, Brazil | -                       | -                | JQ915210                 | -                  | -                | (11)                   |
| ES210        |            | <i>S. brasiliensis</i> | Human sporotrichosis  | Esp fito Santo, Brazil | -                       | -                | JQ915211                 | -                  | -                | (11)                   |
| ES213        |            | <i>S. brasiliensis</i> | Feline sporotrichosis | Esp fito Santo, Brazil | -                       | -                | JQ915212                 | -                  | -                | (11)                   |
| ES212        |            | <i>S. brasiliensis</i> | Human sporotrichosis  | Esp fito Santo, Brazil | -                       | -                | JQ915213                 | -                  | -                | (11)                   |
| IPEC27722    |            | <i>S. schenckii</i>    | Human sporotrichosis  | Rio de Janeiro, Brazil | -                       | -                | HQ426961                 | -                  | -                | (9)                    |
| IOC 1226     |            | <i>S. schenckii</i>    | Human sporotrichosis  | Rio de Janeiro, Brazil | -                       | -                | HQ426962                 | -                  | -                | (9)                    |
| IOC 1113     |            | <i>S. schenckii</i>    | Human sporotrichosis  | Rio de Janeiro, Brazil | -                       | -                | HQ426960                 | -                  | -                | (9)                    |
| 26961        |            | <i>S. schenckii</i>    | Human sporotrichosis  | Rio de Janeiro, Brazil | -                       | -                | JN995605                 | -                  | -                | (10)                   |
| IPEC27135    |            | <i>S. globosa</i>      | Human sporotrichosis  | Rio de Janeiro, Brazil | -                       | -                | GU456632                 | -                  | -                | (12)                   |
| SP01         | -          | <i>S. schenckii</i>    | Human sporotrichosis  | Italy                  | -                       | -                | -                        | -                  | -                | (13)                   |
| CDM 18       | -          | <i>S. schenckii</i>    | Human sporotrichosis  | Italy                  | -                       | -                | -                        | -                  | -                | (13)                   |
| Ss159        | CBS 132976 | <i>S. schenckii</i>    | Human sporotrichosis  | Japan                  | 1157bp                  | H42              | KF574464                 | KJ020504           | KF574450         | (4)                    |
| Ss160        | -          | <i>S. schenckii</i>    | Human sporotrichosis  | Mexico                 | 557bp                   | H51              | KF574465                 | KJ020505           | KF574451         | (4)                    |
| Ss161        | -          | <i>S. schenckii</i>    | Human sporotrichosis  | Mexico                 | 557bp                   | H50              | KF574466                 | KJ020506           | KF574452         | (4)                    |
| Ss162        | CBS 132977 | <i>S. schenckii</i>    | Vegetal               | Mexico                 | 1157bp                  | H41              | KF574467                 | KJ020507           | KF574453         | (4)                    |
| Ss163        | -          | <i>S. schenckii</i>    | Human sporotrichosis  | Peru                   | 1157bp                  | H43              | KF574468                 | KJ020508           | KF574454         | (4)                    |
| Ss164        | -          | <i>S. schenckii</i>    | Human sporotrichosis  | Peru                   | 557bp                   | H70              | KF574469                 | KJ020509           | KF574455         | (4)                    |
| Ss167        | CBS 132978 | <i>S. schenckii</i>    | Soil                  | Peru                   | 1157bp                  | H43              | KF943708                 | KJ020510           | -                | This study             |
| Ss168        | CBS 132979 | <i>S. schenckii</i>    | Human sporotrichosis  | Peru                   | 557bp                   | H65              | KF943709                 | KJ020511           | -                | This study             |

| Isolate code            | CBS code   | Species             | Source               | Origin         | mtDNA type <sup>a</sup> | Hap <sup>b</sup> | GenBank accession number |                    |                  | Reference <sup>f</sup> |
|-------------------------|------------|---------------------|----------------------|----------------|-------------------------|------------------|--------------------------|--------------------|------------------|------------------------|
|                         |            |                     |                      |                |                         |                  | CAL <sup>c</sup>         | mtDNA <sup>d</sup> | ITS <sup>e</sup> |                        |
| Ss170                   | -          | <i>S. schenckii</i> | Human sporotrichosis | Peru           | -                       | -                | KF943710                 | -                  | -                | This study             |
| Ss228                   | -          | <i>S. schenckii</i> | Human sporotrichosis | Peru           | 557bp                   | H74              | KF943711                 | KJ020517           | -                | This study             |
| Ss229                   | -          | <i>S. schenckii</i> | Human sporotrichosis | Peru           | 557bp                   | H66              | KF943712                 | KJ020518           | -                | This study             |
| Ss230                   | -          | <i>S. schenckii</i> | Human sporotrichosis | Peru           | 1157bp                  | H49              | KF943713                 | KJ020519           | -                | This study             |
| Ss231                   | -          | <i>S. schenckii</i> | Human sporotrichosis | Peru           | 557bp                   | H75              | KF943714                 | KJ020520           | -                | This study             |
| Ss232                   | -          | <i>S. schenckii</i> | Human sporotrichosis | Peru           | 557bp                   | H71              | KF943715                 | KJ020521           | -                | This study             |
| Ss234                   | -          | <i>S. schenckii</i> | Human sporotrichosis | Peru           | 557bp                   | H57              | KF943716                 | KJ020522           | -                | This study             |
| Ss235                   | -          | <i>S. schenckii</i> | Human sporotrichosis | Peru           | 557bp                   | H76              | KF943717                 | KJ020523           | -                | This study             |
| ATCC 4821 <sup>G</sup>  | CBS 132984 | <i>S. schenckii</i> | Human sporotrichosis | USA            | 557bp                   | H52              | KF574470                 | KJ020536           | JQ070112         | (4)                    |
| FMR 8600 <sup>T</sup>   | CBS 120340 | <i>S. globosa</i>   | Human sporotrichosis | Spain          | 557bp                   | H89              | AM116908                 | KJ020513           | FN549905         | (6, 7)                 |
| FMR8595                 | CBS 130104 | <i>S. globosa</i>   | Human sporotrichosis | Spain          | 557bp                   | H90              | AM116905                 | KJ020514           | -                | (6, 7)                 |
| ATCC 10268              | -          | <i>S. schenckii</i> | Human sporotrichosis | USA            | 1157bp                  | -                | AB568599                 | -                  | -                | (6, 7, 14)             |
| FMR 8598                | CBS 130116 | <i>S. globosa</i>   | Human sporotrichosis | Spain          | 557bp                   | -                | AM116903                 | KJ020537           | KC113226         | (6, 7)                 |
| KMU 2052                | -          | <i>S. globosa</i>   | Human sporotrichosis | USA            | 557bp                   | -                | AB568600                 | -                  | -                | (6, 7, 14)             |
| FMR 9107                | CBS 120342 | <i>S. mexicana</i>  | Vegetal              | Mexico         | -                       | -                | AM398392                 | -                  | -                | (6, 7)                 |
| FMR 9108 <sup>T</sup>   | CBS 120341 | <i>S. mexicana</i>  | Soil                 | Mexico         | -                       | -                | AM398393                 | -                  | -                | (6, 7)                 |
| FMR 8939 <sup>T</sup>   | CBS 302.73 | <i>S. pallida</i>   | Soil                 | United Kingdom | -                       | -                | AM398396                 | -                  | -                | (6, 7)                 |
| FMR 8803                | -          | <i>S. pallida</i>   | Insect               | China          | -                       | -                | -                        | -                  | -                | (6, 7)                 |
| CBS 359.36 <sup>T</sup> | CBS 359.36 | <i>S. schenckii</i> | Human sporotrichosis | USA            | 557bp                   | H50              | AM117437                 | KJ020515           | FJ545232         | (6, 7)                 |
| UTHSC99-173             | -          | <i>S. schenckii</i> | Human sporotrichosis | USA            | -                       | -                | -                        | -                  | -                | (6, 7)                 |
| FMR 9280 <sup>T</sup>   | CBS 937.72 | <i>S. luriei</i>    | Human sporotrichosis | South Africa   | 1157bp                  | H30              | AM747302                 | KJ020516           | -                | (8)                    |
| CBS 111110              | CBS 111110 | <i>S. pallida</i>   | Insect               | Germany        | -                       | -                | AM398382                 | -                  | -                | (6, 7)                 |
| CBS 292.55              | CBS 292.55 | <i>S. globosa</i>   | Human sporotrichosis | United Kingdom | -                       | -                | AM490354                 | -                  | -                | (6, 7)                 |
| CBS 938.72              | CBS 938.72 | <i>S. schenckii</i> | Human sporotrichosis | France         | -                       | -                | AM490340                 | -                  | -                | (6, 7)                 |
| FMR 8604                | -          | <i>S. schenckii</i> | Human sporotrichosis | Peru           | -                       | -                | AM117429                 | -                  | -                | (6, 7)                 |
| FMR 8608                | -          | <i>S. schenckii</i> | Human sporotrichosis | Peru           | -                       | -                | AM117441                 | -                  | -                | (6, 7)                 |
| FMR 8677                | -          | <i>S. schenckii</i> | Human sporotrichosis | Argentina      | -                       | -                | AM117436                 | -                  | -                | (6, 7)                 |
| FMR 8679                | -          | <i>S. schenckii</i> | Human sporotrichosis | Argentina      | -                       | -                | AM117445                 | -                  | -                | (6, 7)                 |
| FMR 9023                | -          | <i>S. globosa</i>   | Human sporotrichosis | Japan          | -                       | -                | AM399016                 | -                  | -                | (6, 7)                 |
| FMR 9051                | -          | <i>S. schenckii</i> | Human sporotrichosis | Venezuela      | -                       | -                | AM490342                 | -                  | -                | (6, 7)                 |
| IHEM 3774               | -          | <i>S. schenckii</i> | Human sporotrichosis | Colombia       | -                       | -                | AM117447                 | -                  | -                | (6, 7)                 |
| MCCL220085              | -          | <i>S. globosa</i>   | Human sporotrichosis | India          | -                       | -                | AM490353                 | -                  | -                | (6, 7)                 |

| Isolate code | CBS code | Species             | Source               | Origin | mtDNA type <sup>a</sup> | Hap <sup>b</sup> | GenBank accession number |                    |                  | Reference <sup>f</sup> |
|--------------|----------|---------------------|----------------------|--------|-------------------------|------------------|--------------------------|--------------------|------------------|------------------------|
|              |          |                     |                      |        |                         |                  | CAL <sup>c</sup>         | mtDNA <sup>d</sup> | ITS <sup>e</sup> |                        |
| UTHSC04-1485 | -        | <i>S. globosa</i>   | Human sporotrichosis | USA    | -                       | -                | AM399015                 | -                  | -                | (6, 7)                 |
| UTHSC04-2235 | -        | <i>S. schenckii</i> | Human sporotrichosis | USA    | -                       | -                | AM398984                 | -                  | -                | (6, 7)                 |
| UTHSC05-127  | -        | <i>S. globosa</i>   | Human sporotrichosis | USA    | -                       | -                | AM398992                 | -                  | -                | (6, 7)                 |
| UTHSC05-2843 | -        | <i>S. schenckii</i> | Human sporotrichosis | USA    | -                       | -                | AM399012                 | -                  | -                | (6, 7)                 |

<sup>a</sup>mtDNA type, based on amplification using the primers 975-8038F and 975-9194R (14)

<sup>b</sup>Haplotype estimated using DnaSP software version 5.10 for the concatenated data set (calmodulin + mtDNA)

<sup>c</sup>Calmodulin data set, amplified and sequenced using the primers CL1 and CL2A (15)

<sup>d</sup>Intergenic region between *atp9* and *cox2* genes in the *Sporothrix* mitochondrial genome, amplified and sequenced using the primers 975-8038F and 975-9194R (14)

<sup>e</sup>Internal transcribed spacer data set including ITS1+5.8S+ITS2, amplified and sequenced using the primers ITS1 and ITS4 (16)

<sup>f</sup>All mtDNA sequences were generated in this study.

IPEC, Instituto de Pesquisa Clínica Evandro Chagas, Fiocruz, Brazil; FMR, Facultat de Medicina i Ciències de la Salut, Reus, Spain; CBS, Centraalbureau voor Schimmelcultures, Utrecht, The Netherlands; KMU, Kanazawa Medical University, Ishikawa, Japan; UTHSC, Fungus Testing Laboratory, University of Texas Health Science Center; MCCL, Mycology Culture Collection Laboratory, Postgraduate Institute of Medical Education and Research, Chandigarh, India; IHEM, BCCM/IHEM Biomedical Fungi and Yeasts Collection, Belgium; ATCC: American Type Culture Collection, Manassas, USA; NK, not known; <sup>T</sup>, type strain; <sup>G</sup>, genome project. All “Ss” strains belong to the culture collection of Federal University of São Paulo (UNIFESP).

## Supplementary References

1. Rodrigues AM, de Melo Teixeira M, de Hoog GS, Schubach TMP, Pereira SA, Fernandes GF, *et al.* Phylogenetic analysis reveals a high prevalence of *Sporothrix brasiliensis* in feline sporotrichosis outbreaks. *PLoS Negl Trop Dis* 2013; **7**(6): e2281.
2. Rodrigues AM, de Hoog S, de Camargo ZP. Emergence of pathogenicity in the *Sporothrix schenckii* complex. *Med Mycol* 2013; **51**(4): 405–412.
3. Fernandes GF, dos Santos PO, Rodrigues AM, Sasaki AA, Burger E, de Camargo ZP. Characterization of virulence profile, protein secretion and immunogenicity of different *Sporothrix schenckii sensu stricto* isolates compared with *S. globosa* and *S. brasiliensis* species. *Virulence* 2013; **4**(3): 241-249.
4. Sasaki AA, Fernandes GF, Rodrigues AM, Lima FM, Marini MM, Feitosa LS, *et al.* Chromosomal polymorphisms in the *Sporothrix schenckii* complex. *PLoS ONE* **9**(1): e86819.
5. Silva-Vergara ML, de Camargo ZP, Silva PF, Abdalla MR, Sgarbieri RN, Rodrigues AM, *et al.* Disseminated *Sporothrix brasiliensis* infection with endocardial and ocular involvement in an HIV-infected patient. *Am J Trop Med Hyg* 2012; **86**(3): 477-480.
6. Marimon R, Cano J, Gen éJ, Sutton DA, Kawasaki M, Guarro J. *Sporothrix brasiliensis*, *S. globosa*, and *S. mexicana*, three new *Sporothrix* species of clinical interest. *J Clin Microbiol* 2007; **45**(10): 3198-3206.
7. Marimon R, Gen éJ, Cano J, Trilles L, Dos Santos Laz éra M, Guarro J. Molecular phylogeny of *Sporothrix schenckii*. *J Clin Microbiol* 2006; **44**(9): 3251-3256.
8. Marimon R, Gen éJ, Cano J, Guarro J. *Sporothrix luriei*: a rare fungus from clinical origin. *Med Mycol* 2008; **46**(6): 621-625.

9. Oliveira MM, Almeida-Paes R, Muniz MM, Gutierrez-Galhardo MC, Zancope-Oliveira RM. Phenotypic and molecular identification of *Sporothrix* isolates from an epidemic area of sporotrichosis in Brazil. *Mycopathologia* 2011 Oct; **172**(4): 257-267.
10. de Oliveira MME, Sampaio P, Almeida-Paes R, Pais C, Gutierrez-Galhardo MC, Zancope-Oliveira RM. Rapid identification of *Sporothrix* species by T3B fingerprinting. *J Clin Microbiol* 2012; **50**(6): 2159-2162.
11. Oliveira MM, Maifrede SB, Ribeiro MA, Zancope-Oliveira RM. Molecular identification of *Sporothrix* species involved in the first familial outbreak of sporotrichosis in the state of Espirito Santo, Southeastern Brazil. *Mem Inst Oswaldo Cruz* 2013; **108**(7): 936-938.
12. de Oliveira MM, de Almeida-Paes R, de Medeiros Muniz M, de Lima Barros MB, Galhardo MC, Zancope-Oliveira RM. Sporotrichosis caused by *Sporothrix globosa* in Rio De Janeiro, Brazil: case report. *Mycopathologia* 2010; **169**(5): 359-363.
13. Romeo O, Scordino F, Criseo G. New insight into molecular phylogeny and epidemiology of *Sporothrix schenckii* species complex based on calmodulin-encoding gene analysis of Italian isolates. *Mycopathologia* 2011; **172**(3): 179-186.
14. Kawasaki M, Anzawa K, Mochizuki T, Ishizaki H. New strain typing method with *Sporothrix schenckii* using mitochondrial DNA and polymerase chain reaction restriction fragment length polymorphism (PCR-RFLP) technique. *J Dermatol* 2012; **39**(4): 362-365.
15. O'Donnell K, Nirenberg H, Aoki T, Cigelnik E. A multigene phylogeny of the *Gibberella fujikuroi* species complex: Detection of additional phylogenetically distinct species. *Mycoscience* 2000; **41**(1): 61-78.
16. White TJ, Bruns T, Lee S, Taylor J. Amplification and direct sequencing of fungal ribosomal RNA genes for phylogenetics. In: Innis M, Gelfand D, Shinsky J, White T (eds). *PCR Protocols: A Guide to Methods and Applications*. Academic Press 1990, pp 315-322.
